# Supplementary material for: Synthesis of a graft-copolymer adsorbent through a green route and studies on its interactions with chromium(iii) through active functional groups: kinetics and improved adsorption supported by SEM-EDX and AFM
Source: Royal Society of Chemistry journal article supplement (doi:10.1039/c5ra05799j), 2015-01-01
Supplement: c5ra05799j1.pdf [file c5ra05799j1.pdf]

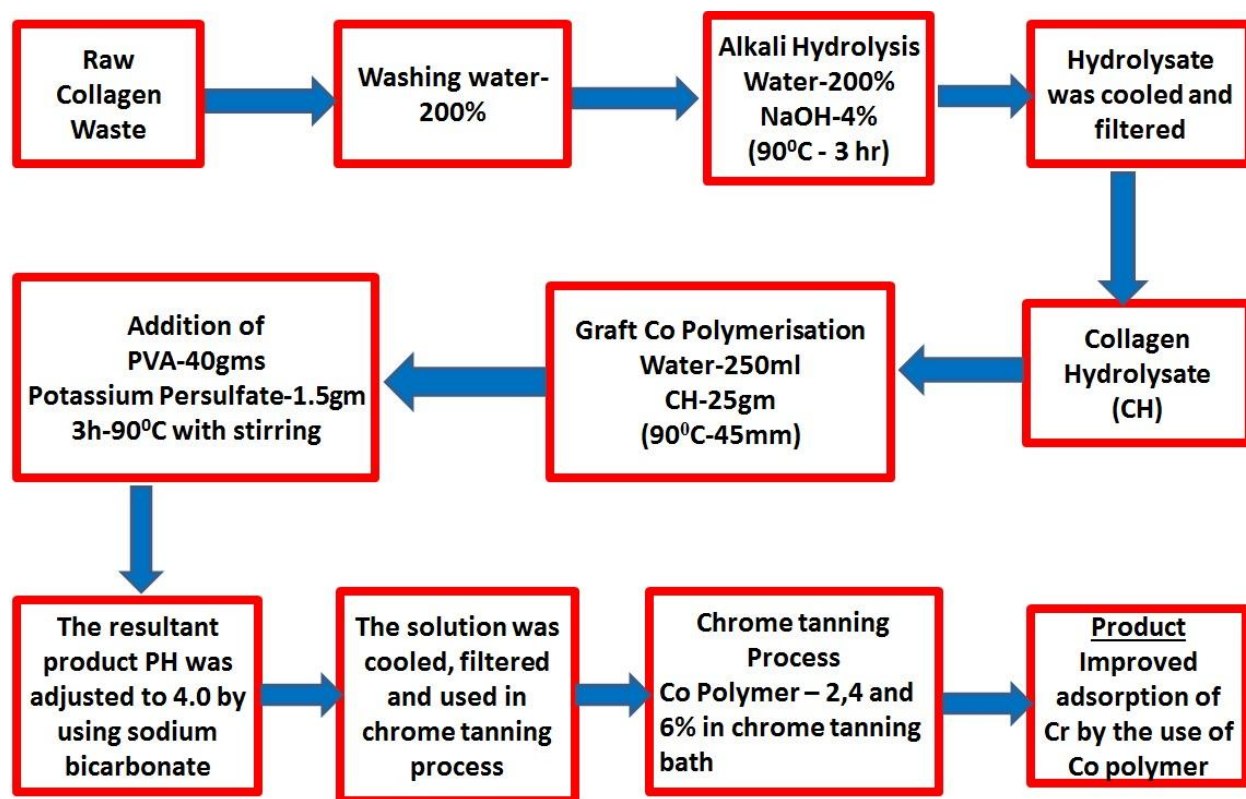

Supporting Scheme 1. Flow scheme showing the preparation of copolymer from collagen waste and its application in chrome absorption process.

**Supporting Table 1. Characteristics of grafted copolymer**

| <b>Characteristics of NPD</b>                                           | <b>Values</b>      |
|-------------------------------------------------------------------------|--------------------|
| pH                                                                      | 5.0                |
| Particle size                                                           | 1366 nm            |
| Relative viscosity (CP)                                                 | 0.85               |
| Molecular weight of the polymer ( $M_n$ )                               | $6.00 \times 10^5$ |
| CH : PVA                                                                | 1:1.6              |
| Polydispersity index (z-average mean of the particle size distribution) | 1.00               |
| % Solid level                                                           | 19.20              |

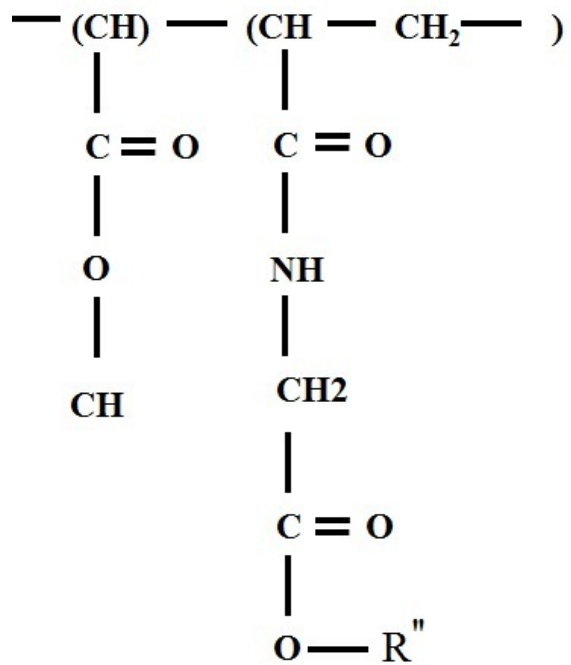

**Supporting Figure 1.** Structure of grafted copolymer prepared from Collagen Hydrolysate (CH) and Poly Vinyl Alcohol (PVA = R'')

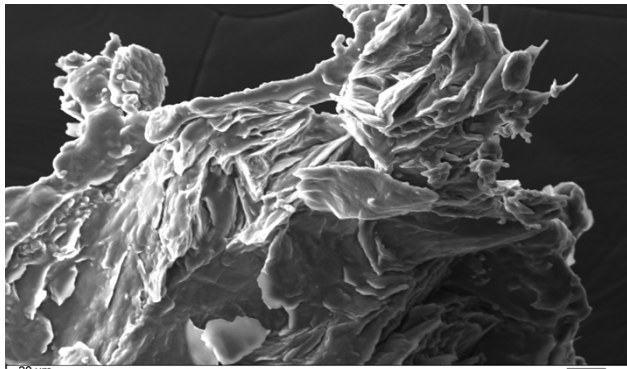

a) Co-Polymer

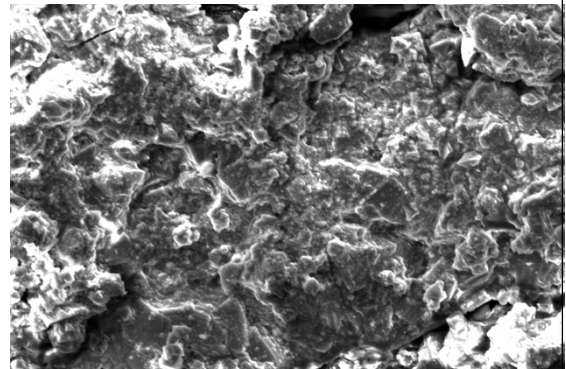

b) 2%

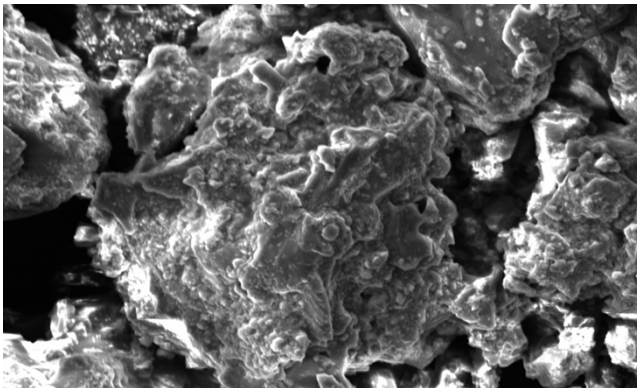

c) 4%

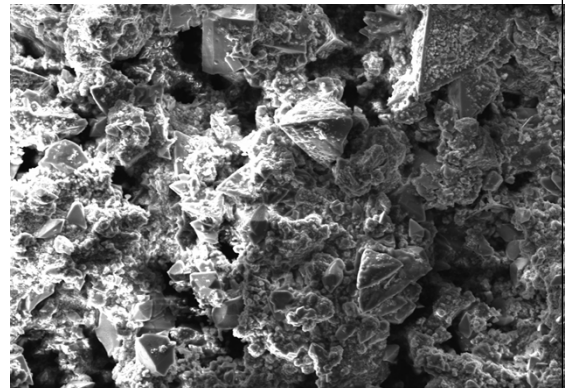

d) 6%

**Supporting Figure 2.** SEM micrographs a) Co-Polymer, b) 2% copolymer treated sample, c) 4% copolymer treated sample, d) 6 % copolymer treated sample

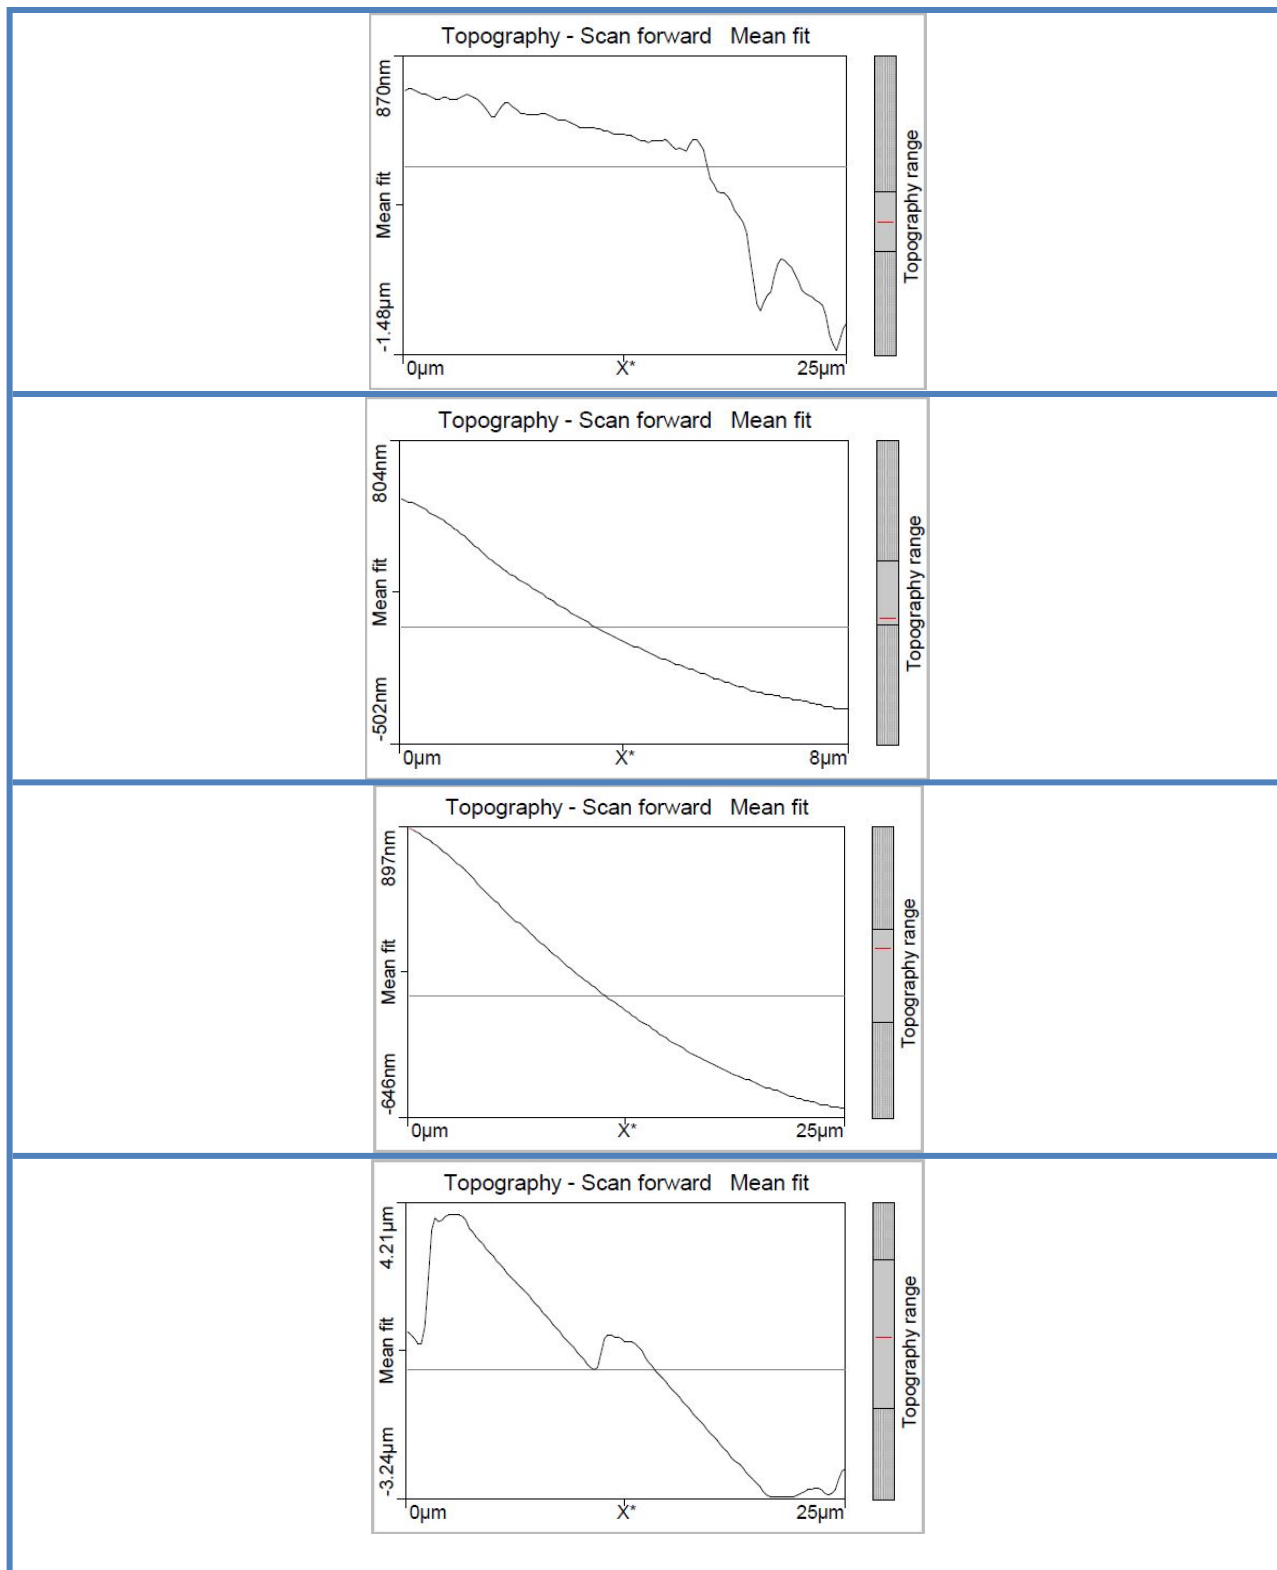

**Supporting Figure 3.** Mean fit of topography of experimental sample using AFM. (t-b): Pure co-polymer sampe, 2% co-polymer treated in Cr (III) absorption, 4% co-polymer treated in Cr (III) absorption, 6% co-polymer treated in Cr (III) absorption.
